# Supplementary material for: Human granulocyte-colony stimulating factor (G-CSF)/stem cell factor (SCF) fusion proteins: design, characterization and activity
Source: PeerJ. 2020 Aug 21;8:e9788. doi: 10.7717/peerj.9788 (PMC7444511; doi:10.7717/peerj.9788)
Supplement: Supplemental Information 7 [file peerj-08-9788-s007.xlsx]

## Sheet: Yield (by Bradford method)
SCF-Lα-GCSF studies	Measured AU, 595 nm			Measured volume, mL			Dilution factor			Equation of the generated BSA standard curve*			Concentration, mg/mL			Quantity, mg			Yield, %			Mean, %	STDEV
Stage	1	2	3	1	2	3	1	2	3	1	2	3	1	2	3	1	2	3	1	2	3
Solubilization	0.5034	0.5177	0.5012	120	118	119	4	4	4	y = 1.026x + 0.0710	y = 1.057x + 0.0460	y = 1.016x + 0.0390	1.7368	1.78505	1.81969	208.416	210.636	216.543	100	100	100	100	0
Refolding	0.5235	0.4473	0.4301	437	455	470	1	1	1	y = 1.073x + 0.0630	y = 0.927x + 0.0440	y = 0.893x + 0.0370	0.429171	0.435059	0.440202	187.548	197.952	206.895	89.9873	93.9782	95.5446	93.17	2.86546
I chromatography step (anion exchange)	0.6322	0.5866	0.7001	25	23	27	1	1	1	y = 1.085x + 0.0710	y = 0.849x + 0.0180	y = 1.057x + 0.0460	0.566762	0.669729	0.618827	14.1691	15.4038	16.7083	6.79846	7.31298	7.71596	7.2758	0.459876
II chromatography step (mixed mode)	0.3035	0.2719	0.2956	20	18	22	1	1	1	y = 1.059x + 0.1380	y = 1.036x + 0.0400	y = 1.026x + 0.0710	0.15628	0.223842	0.218908	3.12559	4.02915	4.81598	1.49969	1.91285	2.22404	1.87886	0.363367
III chromatography step (cation exchange)	0.4267	0.5379	0.4361	4	3	5	2	2	2	y = 0. 976x + 0.0620	y = 1.031x + 0.0650	y = 1.071x + 0.0650	0.747336	0.917362	0.692997	2.98934	2.75209	3.46499	1.43432	1.30656	1.60014	1.44701	0.147202
GCSF-Lα-SCF studies	Measured AU, 595 nm			Measured volume, mL			Dilution factor			Equation of the generated BSA standard curve*			Concentration, mg/mL			Quantity, mg			Yield, %			Mean, %	STDEV
Stage	1	2	3	1	2	3	1	2	3	1	2	3	1	2	3	1	2	3	1	2	3
Solubilization	0.4675	0.4212	0.5017	122	123	118	4	4	4	y = 0.871x + 0.0120	y = 0.954x + 0.0300	y = 0.961x + 0.0610	1.81489	1.64025	1.83434	221.417	201.751	216.452	100	100	100	100	0
Refolding	0.4455	0.4883	0.5857	480	453	448	1	1	1	y = 1.057x + 0.0350	y = 1.010x + 0.0740	y = 1.115x + 0.0820	0.412387	0.410198	0.451749	197.946	185.82	202.383	89.3997	92.1035	93.5004	91.6679	2.08474
I chromatography step (anion exchange)	0.4577	0.5662	0.5628	30	25	25	1	1	1	y = 1.057x + 0.0310	y = 1.084x + 0.0330	y = 0.914 x + 0.0640	0.428372	0.491882	0.545733	12.8512	12.297	13.6433	5.80406	6.09516	6.30316	6.06746	0.250704
II chromatography step (mixed mode)	0.1827	0.2362	0.2629	23	22	24	1	1	1	y = 1.054x + 0.0250	y = 1.052x + 0.0720	y = 1.121x + 0.0460	0.158981	0.156084	0.193488	3.65656	3.43384	4.64371	1.65144	1.70202	2.14538	1.83294	0.271753
III chromatography step (cation exchange)	0.5548	0.5913	0.4543	5	4	4	1	1	2	y = 1.011x + 0.0620	y = 0.933x + 0.0460	y = 1.027x + 0.0480	0.493475	0.584459	0.791237	2.46737	2.33783	3.16495	1.11436	1.15877	1.46219	1.24511	0.189309
*y is absorbance, x is concentration (Bradford assay)

## Sheet: Purity RP-HPLC data
SCF-Lα-GCSF studies	Target peak Area, %*			Mean, %	STDEV
Stage	1	2	3
Solubilization	not determined	not determined	not determined	not applicable	not applicable
Refolding	25.1	24.32	23.11	24.1767	1.00271
I chromatography step (anion exchange)	60.65	64.55	65.21	63.47	2.46439
II chromatography step (mixed mode)	80.99	75.42	76.17	77.5267	3.02269
III chromatography step (cation exchange)	89.78	93.69	92.99	92.1533	2.08495
GCSF-Lα-SCF studies	Target peak Area, %*			Mean, %	STDEV
Stage	1	2	3
Solubilization	not determined	not determined	not determined	not applicable	not applicable
Refolding	33.5	36	37.8	35.7667	2.15948
I chromatography step (anion exchange)	59.9	58.9	57.1	58.6333	1.41892
II chromatography step (mixed mode)	68.76	68.29	64.65	67.2333	2.24954
III chromatography step (cation exchange)	88.7	90.97	91.67	90.4467	1.55262
*Target peak Area, %, represents protein purity by RP-HPLC
