# Supplementary material for: Human granulocyte-colony stimulating factor (G-CSF)/stem cell factor (SCF) fusion proteins: design, characterization and activity
Source: PeerJ. 2020 Aug 21;8:e9788. doi: 10.7717/peerj.9788 (PMC7444511; doi:10.7717/peerj.9788)
Supplement: Supplemental Information 12 [file peerj-08-9788-s012.xlsx]

## Sheet: Supplementary Fig. 3A Raw data
SCF to c-kit
t (s)	F
0	0
9.93714	0.04851
39.6401	0.13511
49.5758	0.2929
89.1088	0.23264
99.044	0.34656
128.853	0.31865
168.39	0.37583
307.175	0.42493
317.111	0.43984
327.048	0.46356
366.684	0.494
416.259	0.47848
426.196	0.54259
465.841	0.52766
505.423	0.55068
515.302	0.55239
525.238	0.56535
564.984	0.62802
584.702	0.6259
594.588	0.6198
604.418	0.5966
753.142	0.62437
763.02	0.65325
812.596	0.64359
822.532	0.6814
832.469	0.65896
881.994	0.68662
921.421	0.6853
941.293	0.70455
980.985	0.69412
990.867	0.70989
1070.25	0.7279
1109.89	0.73931
1129.71	0.74283
1149.42	0.74985
1199.1	0.76394
1278.38	0.7688
1337.78	0.77927
1357.65	0.80079
1397.19	0.77971
1427	0.82448
1476.57	0.83724
1496.4	0.82055
1516.21	0.85041
1565.79	0.83902
1635.18	0.84584
1694.64	0.83637
1754.15	0.8728
1783.91	0.85656
1833.48	0.86622
1863.13	0.8879
1902.61	0.88378
1912.55	0.90266
1962.18	0.8952
1972.06	0.90574
1991.88	0.91364
2011.7	0.91496
2021.63	0.88544
2031.57	0.92155
2071.21	0.90398
2110.85	0.93208
2120.74	0.90692
2150.49	0.9255
2209.95	0.91491
2219.78	0.93168
2249.37	0.91756
2279.18	0.94174
2299.06	0.95624
2308.94	0.93026
2318.77	0.92945
2328.65	0.94666
2348.52	0.94526
2358.46	0.95176
2447.67	0.94884
2457.61	0.9637
2487.37	0.94482
2517.12	0.97073
2586.46	0.95887
2596.4	0.97811
2606.34	0.94789
2616.22	0.96107
2655.91	0.96633
2745.12	0.9716
2755.01	0.95097
2863.93	0.95843
2913.61	0.98302
2953.15	0.9615
2992.89	0.97995
3002.78	0.95624
3022.59	0.95463
3052.35	0.9575
3082.1	0.9839
3131.68	0.97863
3141.61	0.96194
3250.59	0.99663
3280.4	0.9615
3330.02	0.96039
3359.78	0.9755
3379.6	0.994
3389.54	0.98917
3399.47	0.97533
3458.88	0.99356
3607.54	0.99049
3686.77	0.99144
3726.52	0.98676

## Sheet: Supplementary Fig. Raw 3B data
SCF-Lα-GCSF to c-kit
t (s)	F
0	0
9.675	0.1133
19.397	0.22251
29.081	0.2786
38.8108	0.23116
48.4879	0.27414
58.2199	0.3345
67.9497	0.30128
77.6318	0.35055
87.3598	0.38507
97.0328	0.38565
106.767	0.38712
116.44	0.40915
126.171	0.43806
135.906	0.43298
145.58	0.42196
155.312	0.45173
164.988	0.46951
174.72	0.47708
184.452	0.47129
194.174	0.48027
203.906	0.51657
213.638	0.53612
223.315	0.52707
233.045	0.53817
242.721	0.55076
252.453	0.54943
262.186	0.54696
271.86	0.56745
281.592	0.55107
291.267	0.56218
300.998	0.58062
310.673	0.56862
320.405	0.58763
330.134	0.59468
339.813	0.59189
349.544	0.5912
359.217	0.60492
368.952	0.62248
378.625	0.60814
388.358	0.61254
398.033	0.62922
407.765	0.6428
417.498	0.64034
427.174	0.65146
436.904	0.6541
446.638	0.65439
456.313	0.66347
466.044	0.6743
475.718	0.67927
485.45	0.67283
495.126	0.68864
504.857	0.68162
514.589	0.6942
524.264	0.70738
533.994	0.70015
543.67	0.70855
553.405	0.71001
563.078	0.71352
572.811	0.73402
582.542	0.72319
592.217	0.74251
601.95	0.72963
611.622	0.74719
621.356	0.7387
631.03	0.75539
640.765	0.74748
650.492	0.76563
660.17	0.74573
669.902	0.76214
679.576	0.77149
689.309	0.75539
699.042	0.76651
708.716	0.78056
718.447	0.76885
728.123	0.78612
737.855	0.78554
747.531	0.7911
757.262	0.79052
766.994	0.77939
776.668	0.79461
786.4	0.78407
796.076	0.79725
805.807	0.78554
815.483	0.80018
825.215	0.80193
834.946	0.78905
844.623	0.78856
854.356	0.80515
864.027	0.79864
873.76	0.81042
883.434	0.79754
893.168	0.81306
902.9	0.79344
912.575	0.79602
922.307	0.78933
931.98	0.80925
941.713	0.79359
951.445	0.79864
961.12	0.80129
970.852	0.80662
980.527	0.78447
990.258	0.80591
999.933	0.80061

## Sheet: Supplementary Fig3C Raw data
GCSF-Lα-SCF to c-kit
t (s)	F
0	0
9.9348	0.09741
19.8701	0.19203
29.8091	0.28386
39.7398	0.37291
59.6059	0.45918
69.5411	0.54264
99.3608	0.61526
119.224	0.69767
149.026	0.7885
218.577	0.82699
278.191	0.88987
288.127	0.89772
327.872	0.91087
377.542	0.91654
397.415	0.94075
437.156	0.94312
506.809	0.96486
526.68	0.96587
546.55	0.95702
566.425	0.97569
606.167	0.97533
635.967	0.96671
655.839	0.97746
695.58	0.98344
705.516	0.96989
715.45	0.96943
765.133	0.97535
794.94	0.98076
824.748	0.98862
834.677	0.98873
844.611	0.98785
953.906	0.98434
963.84	0.9947
1003.58	0.99379
1013.52	0.99078
1073.13	0.98179
1112.87	0.99619
1142.68	0.99005
1172.48	0.98917
1182.42	0.99136

## Sheet: Supplementary Fig3D. Raw 3D
GCSF-La-SCF to R-GCSF
t (s)	F
64.9057	0.953538
64.981	0.954338
65.0559	0.949646
65.1303	0.948544
65.2048	0.954104
65.2794	0.948623
65.3536	0.958175
65.4283	0.952072
65.5034	0.954509
65.5776	0.954612
65.6522	0.955006
65.7269	0.960967
65.8015	0.947988
65.8766	0.944771
65.9514	0.943708
66.0259	0.9427
66.1008	0.956412
66.1747	0.945365
66.2494	0.943288
66.324	0.945451
66.3987	0.947586
66.4733	0.951172
66.548	0.951929
66.6226	0.952129
66.6973	0.941148
66.7721	0.953639
66.847	0.953658
66.9218	0.945664
66.9959	0.955885
67.0705	0.950255
67.1451	0.945174
67.2198	0.9427
67.2947	0.952285
67.3695	0.945624
67.444	0.949258
67.5184	0.945997
67.593	0.948452
67.6677	0.942918
67.7423	0.951634
67.817	0.953299
67.8916	0.941877
67.9667	0.947955
68.0409	0.947203
68.1155	0.952214
68.1902	0.949922
68.2648	0.942457
68.3395	0.946413
68.4141	0.952103
68.4888	0.954907
68.5634	0.9495
68.6381	0.948298
68.7127	0.938987
68.7874	0.946341
68.862	0.956704
68.9367	0.942507
69.0117	0.946138
69.0862	0.944628
69.161	0.946469
69.2354	0.950444
69.3099	0.943867
69.3845	0.945631
69.4592	0.949409
69.5338	0.950697
69.6085	0.945363
69.6831	0.948075
69.7578	0.952429
69.8324	0.953133
69.907	0.953116
69.9817	0.944676
70.057	0.951443
70.1314	0.950048
70.2058	0.94893
70.2803	0.945526
70.3549	0.946871
70.4296	0.941331
70.5042	0.946471
70.5789	0.944078
70.6535	0.949837
70.7281	0.947135
70.8028	0.9429
70.8774	0.941726
70.9521	0.947633
71.0267	0.950663
71.1014	0.943199
71.1762	0.943056
71.2509	0.947989
71.3253	0.94364
71.4002	0.947335
71.4748	0.945581
71.5493	0.944552
71.6239	0.945453
71.6985	0.952299
71.7732	0.945294
71.8478	0.948385
71.9225	0.944714
71.9971	0.951916
72.0722	0.942058
72.1464	0.94595
72.2213	0.950503
72.2959	0.94259
72.3704	0.944606
72.445	0.95192
72.5196	0.940527
72.5943	0.948522
72.6689	0.946914
72.7436	0.942981
72.8182	0.942542
72.8929	0.938889
72.9675	0.947872
73.0422	0.94357
73.117	0.951697
73.1917	0.952311
73.2661	0.948087
73.3408	1
73.4154	0.932073
73.4903	0.927323
73.5649	0.926292
73.6393	0.932266
73.714	0.93011
73.7886	0.932682
73.8633	0.931329
73.9379	0.930856
74.0126	0.929464
74.0872	0.934144
74.1619	0.924695
74.2365	0.924238
74.3114	0.93228
74.386	0.936573
74.4604	0.929546
74.5351	0.925032
74.6097	0.92905
74.6844	0.923089
74.759	0.924604
74.8337	0.928821
74.9083	0.928307
74.983	0.924283
75.0576	0.929995
75.1323	0.922703
75.2069	0.928031
75.2815	0.927378
75.3564	0.923127
75.4311	0.924475
75.5055	0.926087
75.5803	0.923831
75.655	0.919499
75.7294	0.92258
75.8041	0.92316
75.8787	0.924091
75.9534	0.923282
76.028	0.914825
76.1031	0.922065
76.1773	0.924954
76.2519	0.918836
76.3266	0.922353
76.4015	0.920522
76.4761	0.924792
76.5505	0.919353
76.6252	0.922875
76.6998	0.914068
76.7745	0.913222
76.8491	0.923304
76.9242	0.921838
76.9984	0.915304
77.0735	0.919388
77.1477	0.913782
77.2224	0.925504
77.297	0.915303
77.3716	0.92173
77.4463	0.920125
77.5209	0.915973
77.5956	0.913671
77.6702	0.923425
77.7449	0.909238
77.8195	0.920455
77.8942	0.918681
77.9688	0.918664
78.0435	0.914563
78.1181	0.920426
78.1928	0.916814
78.2674	0.923517
78.342	0.919683
78.4171	0.918555
78.4913	0.909546
78.566	0.924036
78.6406	0.917942
78.7153	0.91905
78.7899	0.920239
78.8646	0.92165
78.9392	0.920654
79.0139	0.917445
79.0885	0.918546
79.1632	0.917098
79.2378	0.9129
79.3124	0.927944
79.3871	0.921464
79.4622	0.917254
79.5364	0.915853
79.611	0.916065
79.6857	0.912338
79.7603	0.918978
79.835	0.915811
79.9096	0.914571
79.9843	0.913699
80.0589	0.914852
80.134	0.90471
80.2082	0.913206
80.2828	0.911554
80.3575	0.918707
80.4321	0.918867
80.5072	0.909203
80.5814	0.916533
80.6561	0.911946
80.7311	0.911047
80.8054	0.916164
80.8804	0.912554
80.9547	0.920323
81.0293	0.913541
81.1044	0.913192
81.1786	0.91181
81.2532	0.917525
81.3279	0.92295
81.4025	0.913483
81.4772	0.911765
81.5518	0.920402
81.6265	0.913897
81.7011	0.914435
81.7758	0.909742
81.8504	0.914985
81.925	0.914624
81.9997	0.915222
82.0743	0.920513
82.149	0.926131
82.2236	0.912267
82.2983	0.915524
82.3729	0.918006
82.4476	0.912888
82.5226	0.910715
82.5969	0.91546
82.6715	0.912143
82.7462	0.914135
82.8208	0.91375
82.8954	0.91241
82.9701	0.91529
83.0447	0.909866
83.1194	0.918902
83.194	0.918313
83.2687	0.915451
83.3433	0.908919
83.418	0.912143
83.4926	0.911984
83.5673	0.913671
83.6423	0.916293
83.7165	0.912066
83.7912	0.914114
83.8658	0.914786
83.9405	0.920214
84.0151	0.909408
84.0898	0.915597
84.1644	0.916613
84.2391	0.912185
84.3137	0.911719
84.3884	0.914335
84.463	0.912069
84.5377	0.916067
84.6127	0.909441
84.6869	0.915945
84.7616	0.917559
84.8362	0.915396
84.9109	0.912062
84.9855	0.915774
85.0602	0.91012
85.1348	0.91338
85.2095	0.908777
85.2841	0.917221
85.3588	0.914766
85.4334	0.912536
85.5085	0.914897
85.5827	0.908848
85.6573	0.911832
85.732	0.913358
85.8071	0.915933
85.8813	0.904383
85.9559	0.914543
86.0306	0.911992
86.1052	0.909916
86.1799	0.91294
86.2545	0.914009
86.3292	0.917165
86.4038	0.913832
86.4784	0.917328
86.5531	0.918379
86.6278	0.913639
86.7024	0.907312
86.777	0.91213
86.8517	0.919472
86.9263	0.905858
87.001	0.911321
87.0756	0.908642
87.1503	0.90844
87.2249	0.91549
87.2996	0.912829
87.3742	0.913596
87.4493	0.919381
87.5235	0.908504
87.5982	0.914505
87.6728	0.917287
87.7474	0.911101
87.8225	0.911862
87.8972	0.912431
87.9714	0.907826
88.046	0.920334
88.1207	0.906449
88.1953	0.899155
88.27	0.914016
88.3446	0.911259
88.4193	0.919097
88.4939	0.905387
88.5685	0.912211
88.6432	0.909652
88.7178	0.915776
88.7925	0.910738
88.8671	0.911374
88.9418	0.910848
89.0164	0.910174
89.0915	0.904891
89.1657	0.911417
89.2404	0.90696
89.3154	0.91499
89.3897	0.907177
89.4643	0.907465
89.5389	0.909122
89.6136	0.909979
89.6887	0.910658
89.7633	0.916203
89.838	0.913904
89.9122	0.920563
89.9873	0.905054
90.0615	0.911148
90.1361	0.913843
90.2108	0.910127
90.2854	0.909298
90.3601	0.910408
90.4347	0.909004
90.5098	0.909297
90.5844	0.908766
90.6591	0.911777
90.7337	0.910318
90.8084	0.907495
90.8826	0.901159
90.9572	0.907916
91.0319	0.916593
91.1065	0.909986
91.1812	0.910244
91.2558	0.909329
91.3309	0.90826
91.4055	0.911928
91.4802	0.914505
91.5544	0.914502
91.629	0.916197
91.7037	0.90583
91.7783	0.91329
91.853	0.908093
91.9276	0.919148
92.0023	0.907506
92.0769	0.909165
92.152	0.910339
92.2262	0.904509
92.3008	0.91174
92.3755	0.911851
92.4501	0.90719
92.5248	0.904858
92.5994	0.906108
92.6741	0.911647
92.7487	0.912882
92.8234	0.910323
92.898	0.915976
92.9731	0.944186
93.0477	0.936776
93.1219	0.92713
93.1966	0.929995
93.2712	0.931127
93.3459	0.927009
93.4205	0.927084
93.4952	0.924458
93.5698	0.935167
93.6445	0.921137
93.7191	0.920001
93.7938	0.9234
93.8684	0.926637
93.943	0.920736
94.0181	0.925795
94.0928	0.922919
94.167	0.917664
94.2416	0.922637
94.3163	0.918995
94.3914	0.921161
94.466	0.929639
94.5406	0.922465
94.6149	0.923067
94.6895	0.923196
94.7642	0.918884
94.8388	0.922248
94.9134	0.923702
94.9881	0.9254
95.0627	0.921232
95.1378	0.922578
95.212	0.91955
95.2867	0.923459
95.3618	0.921842
95.4364	0.920671
95.5106	0.922443
95.5853	0.920401
95.6599	0.916658
95.7346	0.923029
95.8096	0.920214
95.8838	0.925451
95.9589	0.91418
96.0331	0.912937
96.1082	0.916883
96.1829	0.923608
96.2575	0.923008
96.3321	0.919052
96.4064	0.911285
96.4814	0.910426
96.5561	0.911442
96.6303	0.911279
96.7054	0.918336
96.78	0.91604
96.8547	0.918252
96.9289	0.914309
97.0035	0.914738
97.0782	0.916161
97.1528	0.911276
97.2279	0.918753
97.3025	0.915072
97.3768	0.908124
97.4514	0.910357
97.5261	0.922408
97.6007	0.912226
97.6753	0.917796
97.7504	0.910078
97.8251	0.921088
97.8997	0.91102
97.9739	0.916084
98.0486	0.915791
98.1237	0.915427
98.1983	0.915682
98.2725	0.910246
98.3472	0.909326
98.4218	0.919327
98.4969	0.91202
98.5711	0.917897
98.6458	0.906358
98.7204	0.909477
98.7951	0.915443
98.8697	0.916756
98.9443	0.908088
99.019	0.918494
99.094	0.920246
99.1683	0.917539
99.2429	0.916465
99.3176	0.914663
99.3922	0.910811
99.4669	0.911073
99.5415	0.908886
99.6162	0.910581
99.6912	0.911535
99.7654	0.9086
99.8401	0.909533
99.9147	0.913566
99.9898	0.916042
100.064	0.908943
100.139	0.908338
100.213	0.913107
100.288	0.906187
100.363	0.913512
100.437	0.909787
100.512	0.911734
100.587	0.914974
100.661	0.912798
100.736	0.91618
100.81	0.914683
100.885	0.896851
100.96	0.9187
101.034	0.904099
101.109	0.910015
101.184	0.911917
101.258	0.91067
101.333	0.912118
101.408	0.906099
101.482	0.902951
101.557	0.918109
101.632	0.908592
101.706	0.908109
101.781	0.910508
101.856	0.914078
101.93	0.914428
102.005	0.90548
102.079	0.913469
102.155	0.907396
102.229	0.909741
102.303	0.912939
102.378	0.919444
102.453	0.906975
102.527	0.90161
102.602	0.912431
102.677	0.908439
102.751	0.919378
102.826	0.908336
102.901	0.909259
102.975	0.905364
103.05	0.908832
103.125	0.904947
103.199	0.910035
103.274	0.911625
103.348	0.91199
103.423	0.907515
103.498	0.911627
103.572	0.910427
103.647	0.909653
103.722	0.912199
103.796	0.901404
103.871	0.905375
103.946	0.910954
104.021	0.908827
104.095	0.912196
104.17	0.909892
104.245	0.911237
104.319	0.911454
104.394	0.910091
104.468	0.906004
104.543	0.91093
104.617	0.90369
104.692	0.911891
104.767	0.906271
104.841	0.907905
104.916	0.905844
104.991	0.909746
105.065	0.903493
105.14	0.902883
105.215	0.90432
105.289	0.896701
105.364	0.905922
105.439	0.905966
105.513	0.904939
105.588	0.896208
