# Supplementary material for: Human granulocyte-colony stimulating factor (G-CSF)/stem cell factor (SCF) fusion proteins: design, characterization and activity
Source: PeerJ. 2020 Aug 21;8:e9788. doi: 10.7717/peerj.9788 (PMC7444511; doi:10.7717/peerj.9788)
Supplement: Supplemental Information 13 [file peerj-08-9788-s013.xlsx]

## Sheet: Figure 6A and 6B
A
On cell line G-NFS-60	Biological activity, IU/mg							Teoretical molecular weight, g/mol	Biological activity (IU/mmol)
	N = 1	N = 2	N = 3	N = 4	N = 5	Mean	SD		N = 1	N = 2	N = 3	N = 4	N = 5	Mean	SD
SCF-Lα-GCSF	1.34904e+07	1.2015e+07	1.93446e+07	-	-	1.495e+07	3.87665e+06	42369.7	5.71583e+11	5.09073e+11	8.19624e+11	-	-	6.33427e+11	1.64253e+11
GCSF-Lα-SCF	5.40729e+06	6.53241e+06	5.51207e+06	5.51624e+06	6.44127e+06	5.88186e+06	554931	42369.7	2.29105e+11	2.76777e+11	2.33545e+11	2.33722e+11	2.72915e+11	2.49213e+11	2.35123e+10
G-CSF*						100000000		18656.5						1880000000000
*Data provided by manufacturer
B
On cell line M-07e	Biological activity, IU/mg							Teoretical molecular weight, g/mol	Biological activity (IU/mmol)
	N = 1	N = 2	N = 3	N = 4	N = 5	Mean	SD		N = 1	N = 2	N = 3	N = 4	N = 5	Mean	SD
SCF-Lα-GCSF	139359	139891	174746	151999	184879	158175	20701.6	42369.7	5.90459e+09	5.92715e+09	7.40396e+09	6.44016e+09	7.83329e+09	6.70183e+09	8.77122e+08
GCSF-Lα-SCF	261038	310664	344448	285755	308979	302177	31093.8	42369.7	1.10601e+10	1.31628e+10	1.45942e+10	1.21074e+10	1.30913e+10	1.28031e+10	1.31744e+09
SCF*						500000		18656.5						9328245000
*Data provided by manufacturer
